# Supplementary material for: Comparison of CRISPR-Cas9/Cas12a Ribonucleoprotein Complexes for Genome Editing Efficiency in the Rice Phytoene Desaturase (OsPDS) Gene
Source: PubMed Central journal article supplement (PMC6973557; doi:10.1186/s12284-019-0365-z), 2020-01-21
Supplement: 12284_2019_365_MOESM1_ESM.pdf [file 12284_2019_365_MOESM1_ESM.pdf]

1 **Supplementary information**

2  
3 **Comparison of CRISPR-Cas9/Cas12a ribonucleoprotein complexes for genome editing**  
4 **efficiency in rice**

5  
6 Raviraj Banakar<sup>1,2#</sup>, Mollie Schubert<sup>3</sup>, Michael Collingwood<sup>3</sup>, Christopher Vakulskas<sup>3</sup>, Alan L  
7 Eggenberger<sup>1,2</sup>, and Kan Wang<sup>1,2\*</sup>

8  
9 <sup>1</sup> Department of Agronomy, Iowa State University, Ames, IA, USA

10 <sup>2</sup> Crop Bioengineering Center, Iowa State University, Ames, IA, USA.

11 <sup>3</sup> Integrated DNA Technologies, Coralville, IA, USA

12  
13 \* Corresponding author:

14 Kan Wang

15 Email: [kanwang@iastate.edu](mailto:kanwang@iastate.edu)

16 # Current Address: Department of Plant and Microbial genomics, University of Minnesota, St  
17 Paul, MN 55108, USA.

18 **Materials and Methods:**

19

20 ***Choice of PDS1 gene and gRNA design***

21 The single copy rice phytoene desaturase gene (Os03g0184000) was chosen as the target for  
22 CRISPR genome editing (**Fig. 1A**). Three target sites in the first coding exon were chosen to  
23 compare the efficacy of five different CRISPR enzymes, CGGGACAACCTTCCTACTCAT  
24 (targeted by Cas9 crRNA1), AGTTGCTTCAGCATGGATAC (targeted by Cas9 crRNA2) and  
25 CGGGACAACCTTCCTACTCATA (targeted by Cas12a crRNA3) (**Fig. 1B**). Cas9 crRNA1 was  
26 selected for use with Alt-R S.p. Cas9 nuclease and Alt-R S.p. HiFi Cas9 nuclease. Cas9 crRNA1  
27 and Cas9 crRNA2 were chosen for use with Alt-R S.p. Cas9 D10A nickase. Cas12a crRNA3,  
28 which almost completely overlapped with Cas9 crRNA1, was designed for use with Alt-R A.s.  
29 Cas12a, and LbCas12a to allow for direct comparison of Cas9 and Cas12a enzymes in the same  
30 sequence location.

31

32 ***CRISPR proteins, crRNA and tracrRNA molecule synthesis***

33 Alt-R S.p. Cas9 Nuclease V3, Alt-R HiFi S.p. Cas9 Nuclease V3, Alt-R S.p. Cas9 D10A Nickase  
34 V3, Alt-R A.s. Cas12a V3, and LbCas12a proteins were obtained from Integrated DNA  
35 Technologies (IDT), Coralville, IA, USA. Cas9 crRNA1, Cas9 crRNA2, Cas12a crRNA3, and  
36 tracrRNA molecules were chemically synthesized at IDT. The crRNAs contained the 20-21 nt  
37 guide sequence along with the constant region required for each protein tested. All reagents  
38 (enzymes, crRNA and tracrRNA) were shipped to Iowa State University in dry ice and reagents  
39 were stored at -20°C until further use.

40

41 ***CRISPR-RNP complex formation***

42 On the day of CRISPR-RNP delivery to plant cells, 2 nmol crRNA and 5 nmol tracrRNA were  
43 dissolved in 40 µL and 100 µL of nuclease free IDTE buffer (1X TE buffer, pH 7.5), respectively,  
44 to obtain 50 µM solutions of each. To form active gRNA complexes, an equimolar concentration  
45 of crRNA1 and tracrRNA (i.e. 2 µL each at a 50 µM stock concentration) were hybridized by  
46 heating up to 95 °C in a heat block followed by cooling down to room temperature (RT) for 10  
47 min on bench top. To this 4 µL gRNA, 1 µL of 61 µM (10 µg) of Alt-R S.p. Cas9 Nuclease V3 or  
48 Alt-R HiFi S.p. Cas9 Nuclease V3 was added along with 2 µL of 1X PBS buffer (pH 7.4). The  
49 solution was mixed by pipetting followed by short centrifugation and incubated at RT for 10 min  
50 to form an RNP complex. Similarly, for Alt-R S.p. Cas9 D10A Nickase V3, 1 µL each of 50 µM  
51 crRNA1 and crRNA2 were combined with tracrRNA as described above to form gRNA and RNP  
52 complex. In the case of Cas12a enzymes, the custom synthesized crRNA3 for Alt-R A.s. Cas12a  
53 V3 and LbCas12a V3 were dissolved with 40 µL of nuclease free IDTE buffer (1X TE buffer, pH  
54 7.5). To form RNP complexes, 2 µL of 50 µM AsCas12a or LbCas12a crRNA3 were combined  
55 with 1 µL from the 10 µg/µL (63 µM) Alt-R A.s. Cas12a V3 or LbCas12a, respectively, to form  
56 RNP complexes as previously described.

57

58 ***Gold coating with RNP complexes***

59 To coat the RNP complexes onto 0.6  $\mu$ M gold particles (Bio-Rad cat #1652262), gold particle  
60 solution was prepared as previously described by Banakar and Wang (2019). To a tube of sonicated  
61 1X-gold solution (0.75 mg of gold in 25  $\mu$ L H<sub>2</sub>O-prewarmed to RT), 7  $\mu$ L or 5  $\mu$ L of RNP  
62 complexes of Cas9 and Cas12a, respectively, were transferred. To impart hygromycin resistance  
63 and enrich for transformed cells, 2  $\mu$ L of pCAMBIA1301 (500 ng) plasmid was added and mixed  
64 well by pipetting up and down. To this mixture, 2  $\mu$ L of water-soluble cationic lipid TransIT-2020  
65 (Mirus Bio LLC, Madison, WI) was added and mixed, and then the solution was solution was  
66 incubated on ice for 10 min. Tubes were centrifuged at 8000 rpm for 30s, the supernatant was  
67 discarded, and the pellet was dissolved in 20  $\mu$ L of sterile nuclease free double distilled water  
68 (sdH<sub>2</sub>O) and sonicated 10 s to homogenize the solution. Two macrocarrier discs were prepared by  
69 pipetting 10  $\mu$ L of the solution onto the pre-sterilized macrocarriers in the laminar flow hood.  
70 Macrocarriers were then air dried in the hood for about 20 to 30 min until a dry yellow powder  
71 was visible.

72

73 ***Biolistic co-delivery of RNP and pCAMBIA1301 in rice***

74 Rice (*Oryza sativa* L. cv Nipponbare) was grown in a growth chamber (12:12 light:dark) at Iowa  
75 State University, Ames, IA, as previously described by Banakar and Wang, 2019. Seeds were  
76 harvested and placed in an envelope and air dried at 37 °C for 3 days immediately before use for  
77 transformations. Seed culture to obtain scutellar derived embryos, osmotic treatment, post osmotic  
78 recovery, selection, regeneration and rooting was performed as previously described (Banakar and  
79 Wang, 2019; Banakar, 2016; Banakar et al, 2017; Sudhakar et al., 1998). Briefly, seeds were  
80 germinated on Murashige and Skoog media with 2 mg/L, 2,4-D for 6 days (27 °C, dark). On the  
81 6<sup>th</sup> day scutellum-derived embryos were extracted and placed on MS media with 2 mg/L 2,4-D.  
82 On the seventh day scutellar rice embryos were plated on osmoticum medium with the scutellum  
83 facing up for 4 hours before bombardment. The BioRad Biolistic® PDS-1000/He particle delivery  
84 system was used to co-deliver RNPs and pCAMBIA1301 using 900 PSI rupture discs and a 6 cm  
85 target distance. For each enzyme two technical replicates of 30 embryos each was bombarded.  
86 Post biolistic delivery embryos were kept on the same osmoticum media for 16 hours (27 °C, dark)  
87 before transfer to resting media (MS media with 2 mg/L 2,4-D) for 24 hours (27 °C, dark). This  
88 was followed by two rounds of selection (15 days each) on MS selection media (2 mg/L 2,4-D)  
89 containing 50 mg/L hygromycin. Surviving calli were transferred to MS regeneration media with  
90 BAP (2.5 mg/L), and NAA (0.25 mg/L) and hygromycin (50 mg/L). Surviving tissues from  
91 regeneration media were transferred to ½ strength MS media supplemented with the full strength  
92 of B5 vitamins. Through the tissue culture process tissue derived from a single embryo was  
93 considered to be clonal for transgenes. Hence, all the tissue derived from a single embryo in the  
94 rooting media plates was collected and pooled as single clone, and stored in -80 °C until further  
95 use. When clones were rooted green plantlets, seedlings were transferred to soil.

96

97

98 ***DNA extraction***

99 Genomic DNA was isolated from transgenic calli as previously described by Edwards et al, 1991  
100 with slight modification. Tissues were ground to a fine powder in liquid nitrogen using a pestel  
101 and mortar. For each sample 50 mg of powdered tissue was used for DNA extraction. Five hundred  
102 µl of extraction buffer (200 mM Tris buffer, pH 7.5, 250 mM NaCl, 25 mM Na<sub>2</sub>•EDTA, and 0.5%  
103 sodium dodecyl sulfate [SDS]) was added, and the material was vortexed. Following a  
104 phenol/chloroform extraction, a chloroform extraction, and precipitation with 0.7 volumes of  
105 isopropanol, DNA pellets were resuspended in 50 µl Milli-Q H<sub>2</sub>O and quantified using a  
106 NanoDrop spectrophotometer.

107

108 ***Next Generation Sequencing analysis***

109 The genomic region surrounding the target sites was amplified by using 50 ng of template DNAs  
110 and forward primer (TTGCAGACGCTCTTGCG) and reverse primer  
111 (CAAAGCTCACATGCTGACTACT). The primers contained ‘tails’ to add sample-unique P5 and  
112 P7 indexes for Illumina sequencing in two rounds of PCR. PCR amplicons were sequenced on an  
113 Illumina MiSeq instrument (v2 chemistry, 150 bp paired end reads) (Illumina, San Diego, CA,  
114 USA). Data were analyzed using a custom-built pipeline. Data were demultiplexed (Picard tools  
115 v2.9; <https://github.com/broadinstitute/picard>) and forward and reverse reads were merged into  
116 extended amplicons (flash v1.2.11) (Magoc and Salzberg, 2011). Reads with any base quality score  
117 <10 were filtered out. At each target, editing was calculated as the percentage of total reads  
118 containing an INDEL within a 10 bp window of the cut site. For each transgenic clone reads with  
119 >5% editing was considered as edited.

120

121 **References**

- 122 Banakar R (2016) Mechanisms controlling selective iron and zinc biofortification of rice.  
123 <https://repositori.udl.cat/handle/10459.1/64285>
- 124 Banakar R, Alvarez Fernández Á, Abadía J, Capell T, Christou P (2017) The expression of  
125 heterologous Fe (III) phyto siderophore transporter HvYS1 in rice increases Fe uptake,  
126 translocation and seed loading and excludes heavy metals by selective Fe transport. *Plant*  
127 *Biotechnol J* 15:423-432
- 128 Banakar R, Wang K (2019) Biolistic transformation of Japonica rice varieties. In: *Biolistic DNA*  
129 *Delivery in Plants*. S. Rustgi, H. Luo (eds), Springer, New York, NY. In press.
- 130 Edwards K, Johnstone C, Thompson C (1991) A simple and rapid method for the preparation of  
131 plant genomic DNA for PCR analysis. *Nucleic Acids Res* 19: 1349
- 132 Magoc T, Salzberg SL (2011) FLASH: fast length adjustment of short reads to improve genome  
133 assemblies. *Bioinformatics* 27:2957-2963
- 134 Sudhakar D, Duc LT, Bong BB, Tinjuangjun P, Maqbool SB, Valdez M, Jefferson R, Christou P  
135 (1998). An efficient rice transformation system utilizing mature seed-derived explants and  
136 a portable, inexpensive particle bombardment device. *Transgenic Res* 7:289– 294
